# Supplementary material for: Geometrically customizable alginate hydrogel nanofibers for cell culture platforms
Source: Royal Society of Chemistry journal article supplement (doi:10.1039/c9tb01353a), 2019-01-01
Supplement: c9tb01353a1.pdf [file c9tb01353a1.pdf]

## Supplementary information

# Geometrically Customizable Alginate Hydrogel Nanofibers for Cell Culture Platforms

Satoshi Fujita<sup>a,b \*</sup>, Yuka Wakuda<sup>a</sup>, Minori Matsumura<sup>a</sup>, Shin-ichiro Suye<sup>a,b</sup>

<sup>a</sup>Department of Frontier Fiber Technology and Science, Graduate School of Engineering, University of Fukui, Fukui, 910-8507, Japan

<sup>b</sup>Life Science Innovation Center, University of Fukui, Fukui, 910-8507, Japan

\*Corresponding author at: Department of Frontier Fiber Technology and Science, Graduate School of Engineering, University of Fukui, 3-9-1 Bunkyo, Fukui 910-8507, Japan

Tel/Fax: +81-776-27-9969, E-mail: fujitas@u-fukui.ac.jp

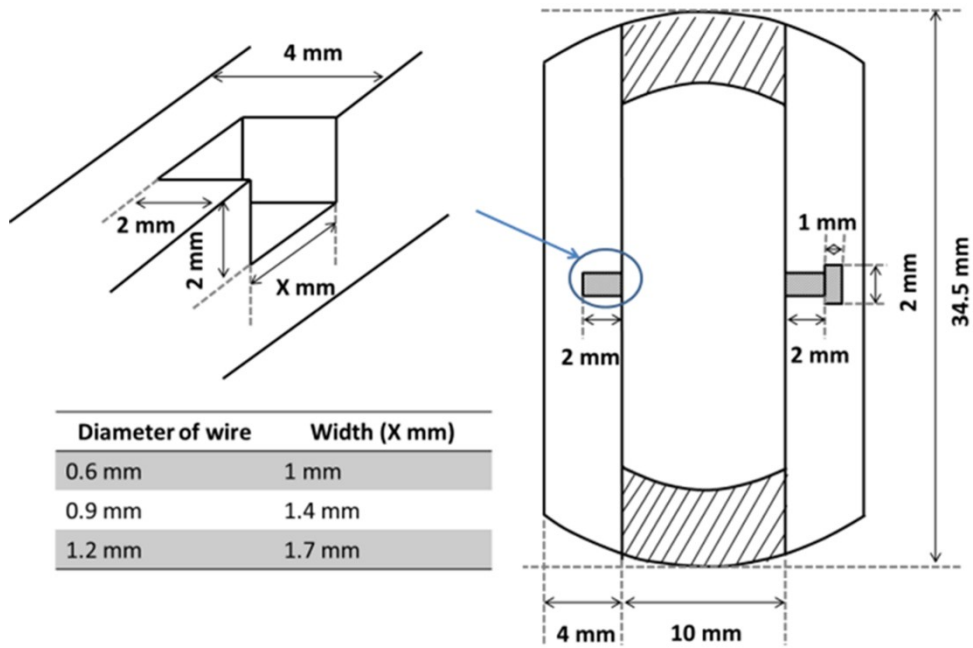

**Fig. S1** Schematic illustration of a wire holder for the suspended culture, which was fabricated from acrylic resin with a laser processing machine.

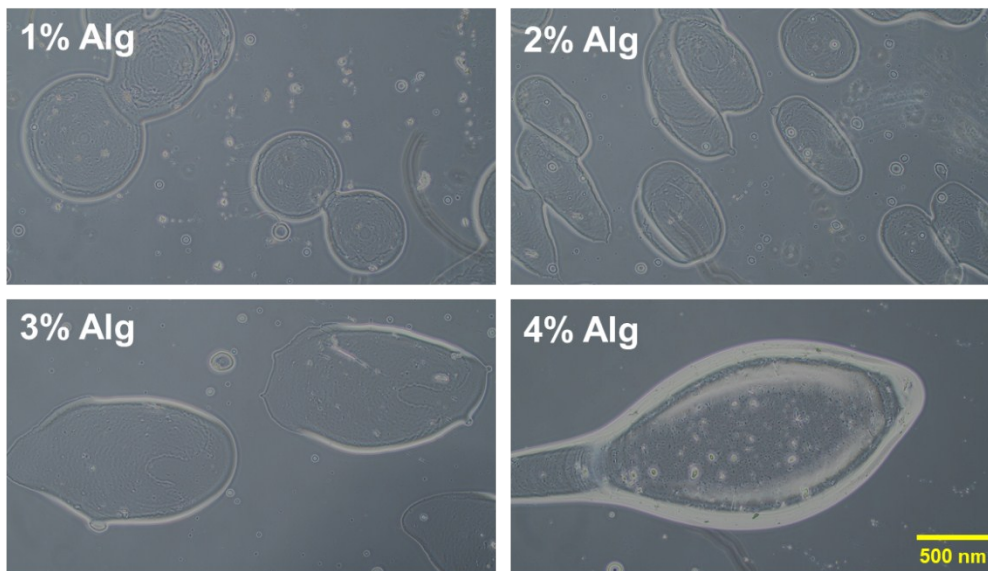

**Fig. S2** Electrospinning of alginate (1,000 cps) aqueous solution alone with a single nozzle. Solutions were sprayed as beads, and no fiber was obtained in those conditions. The alginate solution of 6% and 8% concentration was unable to electrospin due to the high viscosity.

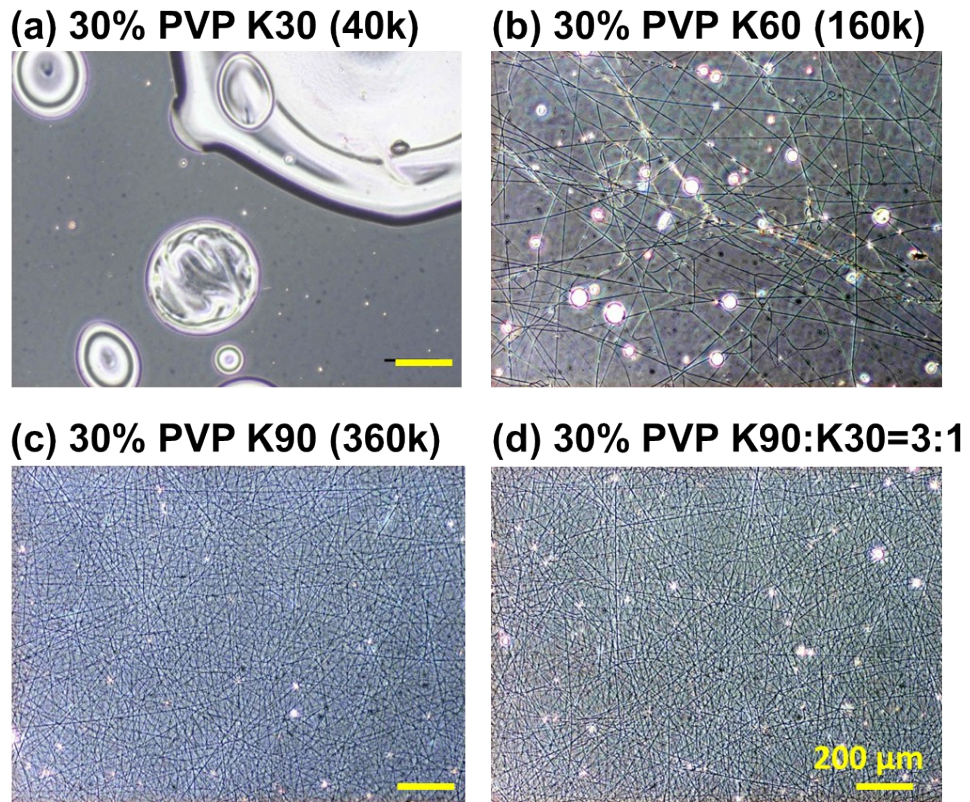

**Fig. S3** Optimization of the molecular weight of PVP for electrospinning.

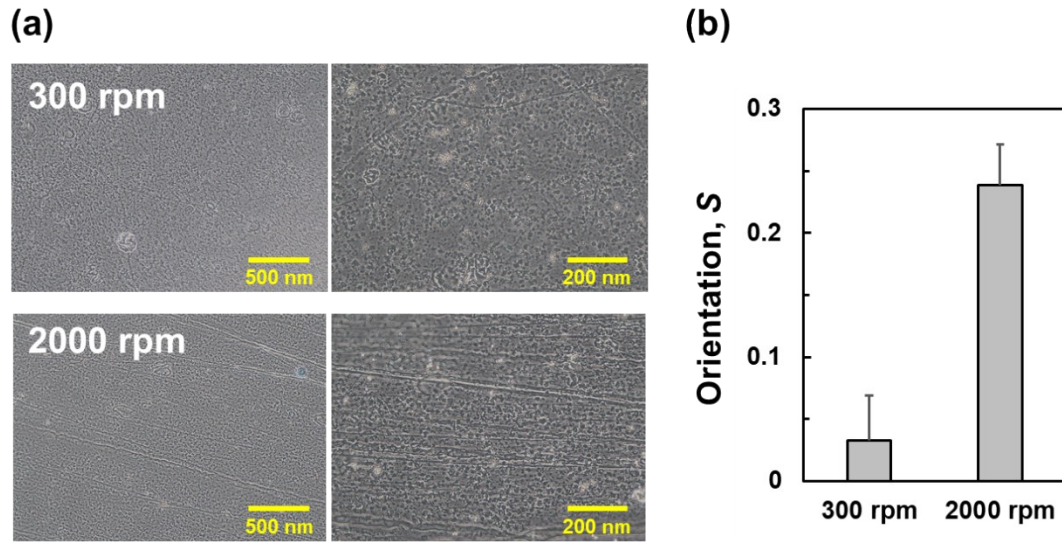

**Fig. S4** (a) Phase contrast images of alginate hydrogel fiber which was electrospun at different rotation speed and following  $\text{Ca}^{2+}$  treatment. (b) Orientation of hydrogel fibers.

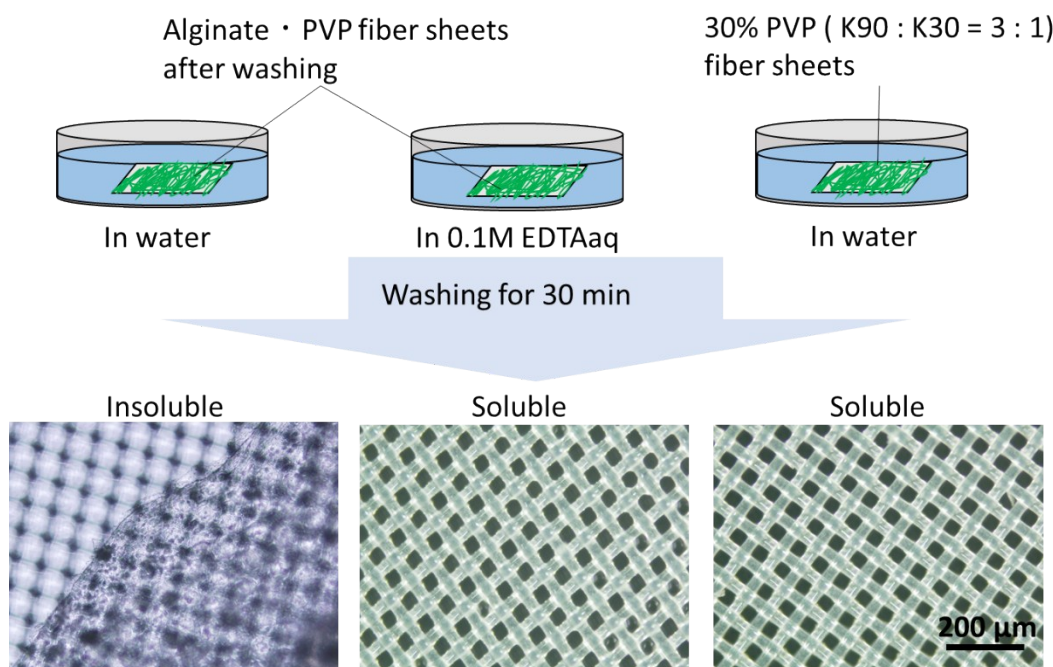

**Fig. S5** Observation of fiber solubility. Alginate fiber sheets treated with  $\text{Ca}^{2+}$  were insoluble in water, but were soluble in a 0.1 M EDTA solution. PVP fibers which contain no alginate dissolve easily in water.

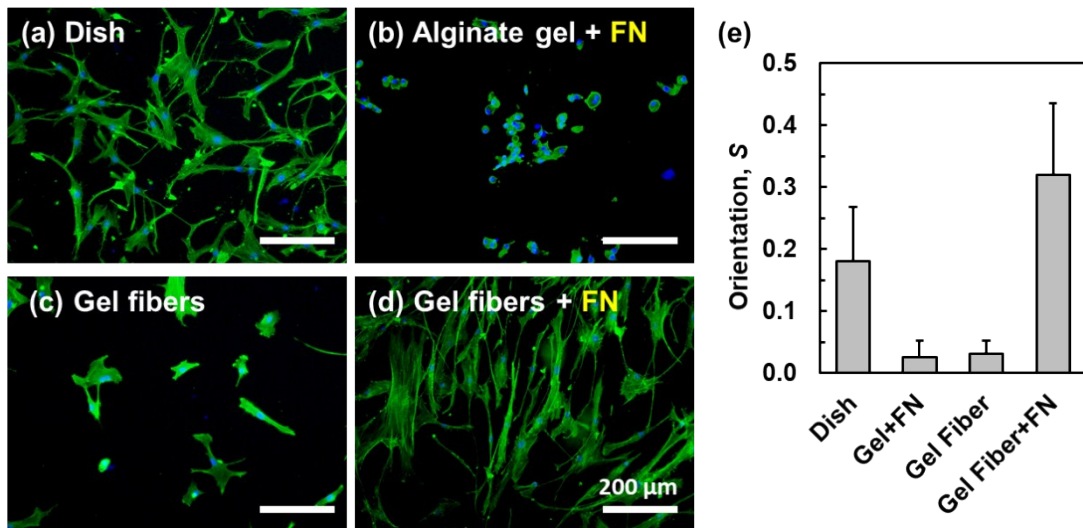

**Fig. S6** Fluorescent images of human mesenchymal stem cells (hMSCs) on glass (a), isotropic normal alginate gel conjugated with fibronectin (b), alginate gel fibers fabricated from alginate/PVP fibers and Ca<sup>2+</sup> treatment without fibronectin (c) and with fibronectin (d). Cells were stained with Hoechst 33342 (nuclei) and Alexa 488 phalloidin (F-actin). The direction of the arrow indicates the direction of fibers. Bar = 200 μm. (e) Orientation of cells cultured on each substrate.
